# Supplementary material for: Improving heterologous expression of laccase by Pichia pastoris via vanillin-induced stress response and its application for removing inhibitors of lignocellulose hydrolysate
Source: Royal Society of Chemistry journal article supplement (doi:10.1039/d4se00988f), 2024-01-01
Supplement: d4se00988f1.pdf [file d4se00988f1.pdf]

**Supporting Information for**  
**Improving heterologous expression of laccase by *Pichia pastoris***  
**via vanillin-induced stress response and its application for**  
**removing inhibitors of lignocellulose hydrolysate**

**Nan Liu**<sup>1,2</sup>, **Bo Li**<sup>1,2</sup>, **Xuebing Zhao**<sup>1,2,\*</sup>

<sup>1</sup> *Key Laboratory of Industrial Biocatalysis, Ministry of Education, Tsinghua University, Beijing 100084, China;*

<sup>2</sup> *Institute of Applied Chemistry, Department of Chemical Engineering, Tsinghua University, Beijing 100084, China*

**\*Corresponding author:** Xuebing Zhao, Email: [zhaoxb@mail.tsinghua.edu.cn](mailto:zhaoxb@mail.tsinghua.edu.cn)

**Figure S1.** Single clone of the recombinant strain PM(n)-2*gfp*-pPIC9K-*P. pastoris* GS115 with alternative promoter combined with 2GFP on MD plate.

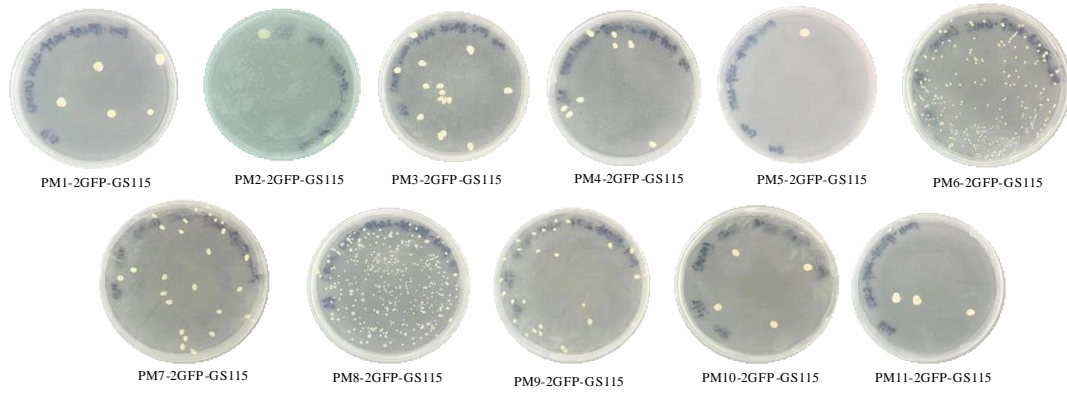

**Figure S2.** Colony PCR of each single clone of the recombinant strain PM(n)-2gfp-pPIC9K-*P. pastoris* GS115.

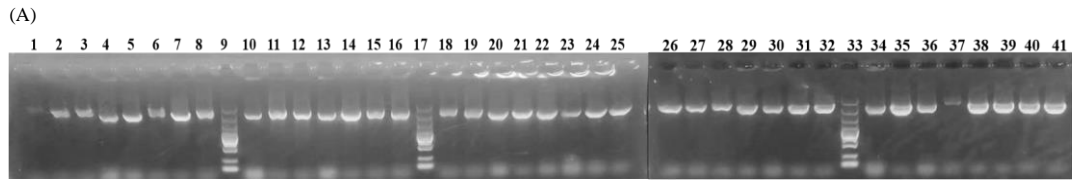

Lane1~Lane16: No.1~No.15 single clone of PM(8)-2gfp-pPIC9K-*P. pastoris* GS115;  
Lane18~Lane32: No.1~No.15 single clone of PM(3)-2gfp-pPIC9K-*P. pastoris* GS115;  
Lane34~Lane41: No.1~No.8 single clone of PM(4)-2gfp-pPIC9K-*P. pastoris* GS115;  
The target length of each fragment is 3173bp; Lane9/Lane17/Lane33: Takara DL5K

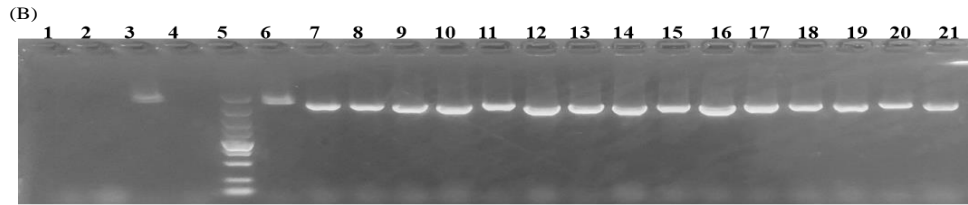

Lane1~Lane4: No.1~No.4 single clone of PM(10)-2gfp-pPIC9K-*P. pastoris* GS115  
(Target length of each fragment is 3348bp); Lane6~Lane21: No.1~No.16 single clone  
of PM(6)-2gfp-pPIC9K-*P. pastoris* GS115 (Target length of each fragment is 3173bp);  
Lane5: Takara DL5K.

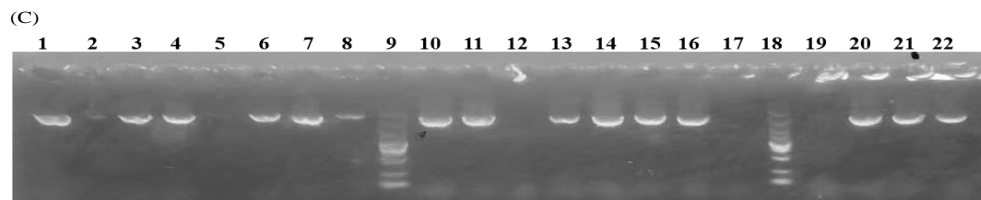

Lane1~Lane22: No.1~No.4 single clone of PM(7)-2gfp-pPIC9K-*P. pastoris* GS115  
(Target length of each fragment is 3348bp); Lane9/Lane18: Takara DL5K

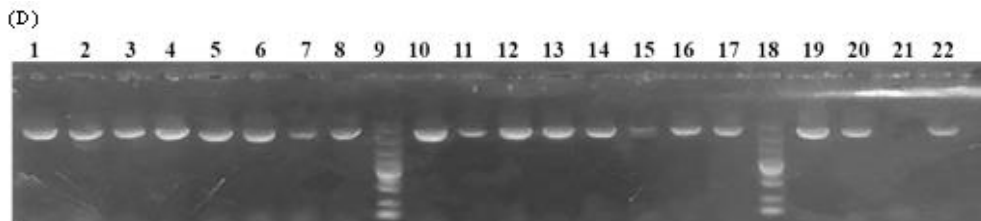

Lane1~Lane22: No.1~No.4 single clone of PM(9)-2gfp-pPIC9K-*P. pastoris* GS115  
(Target length of each fragment is 3348bp); Lane9/Lane18: Takara DL5K

(E)

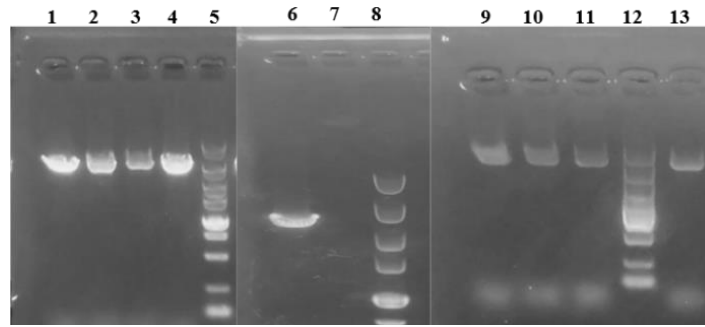

Lane1~Lane4: No.1~No.4 single clone of PM(1)-2gfp-pPIC9K-*P. pastoris* GS115;

Lane6~Lane7: No.1~No.2 single clone of PM(2)-2gfp-pPIC9K-*P. pastoris* GS115;

Lane9~Lane11: No.1~No.3 single clone of PM(11)-2gfp-pPIC9K-*P. pastoris* GS115;

Lane13: single clone of PM(5)-2gfp-pPIC9K-*P. pastoris* GS115 (Target length of each fragment is 3348bp); Lane5/Lane8/Lane12: Takara DL5K

**Figure S3.** Plasmid map of vanillin-sensitive promoters PM4 and PM7 recombined with *lacc6* gene respectively. (A) PM(4)-*lacc6*-P<sub>AOX</sub>-*lacc6*-pPIC9K; (B) PM(4)-P<sub>AOX</sub>-*lacc6*-pPIC9K; (C) PM(4)-*lacc6*-pPIC9K; (D) PM(7)-*lacc6*-P<sub>AOX</sub>-*lacc6*-pPIC9K; (E) PM(7)-P<sub>AOX</sub>-*lacc6*-pPIC9K; (F) PM(7)-*lacc6*-pPIC9K;

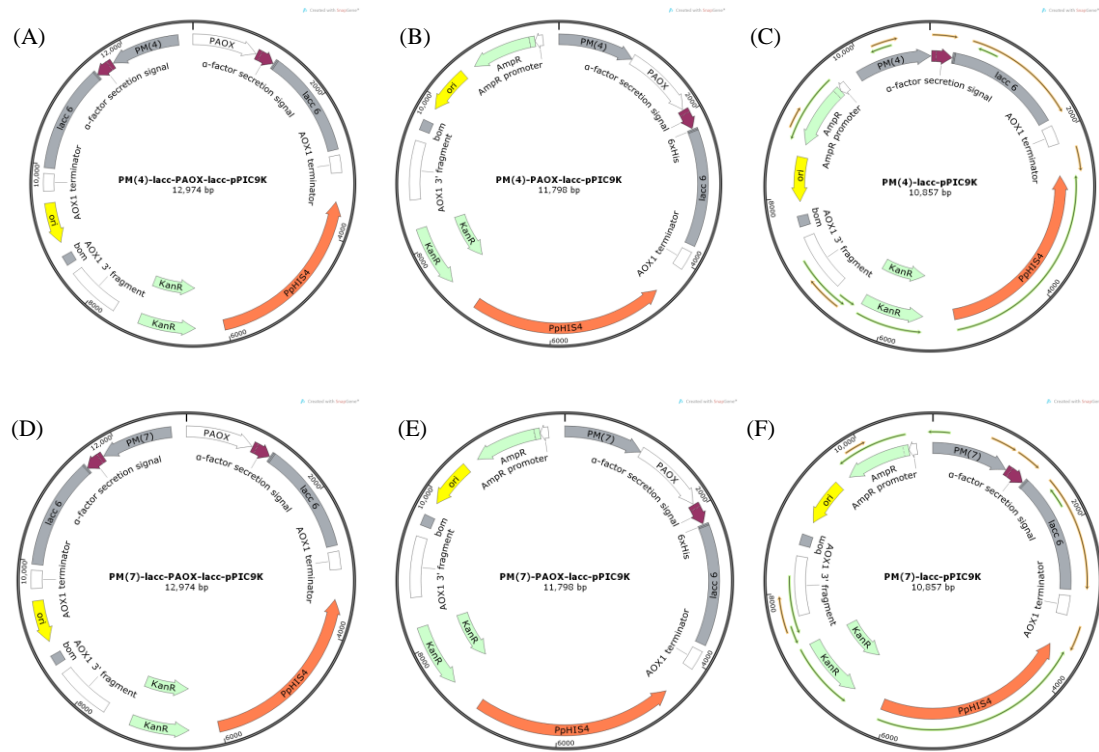

**Figure S4.** Colony PCR of each single clone of vanillin sensitive promoter and laccase gene recombinant strains

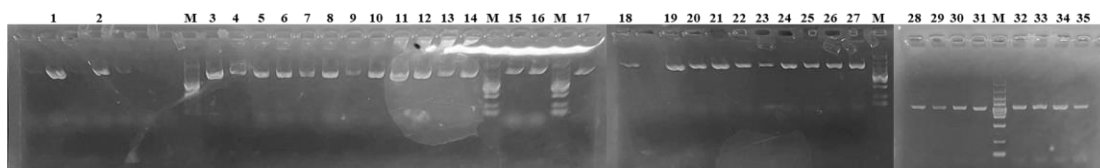

Lane1~Lane2: No.1~No.2 single clone of PM(4)-P<sub>AOX</sub>-*lacc*-pPIC9K-*P. pastoris* GS115 (Target fragment length is 2538 bp); Lane3~Lane14: No.1~No.12 single clone of PM(4)-*lacc*-pPIC9K-*P. pastoris* GS115 (Target fragment length is 2108 bp); Lane15~Lane16: No.1~No.2 single clone of PM(7)-P<sub>AOX</sub>-*lacc*-pPIC9K-*P. pastoris* GS115 (Target fragment length is 2539 bp); Lane17~Lane27: No.1~No.11 single clone of PM(7)-*lacc*-pPIC9K-*P. pastoris* GS115 (Target fragment length is 2113 bp); Lane28~Lane31: No.1~No.4 single clone of PM(4)-*lacc*-P<sub>AOX</sub>-*lacc*-pPIC9K-*P. pastoris* GS115 (Target fragment length is 1041bp); Lane32~Lane35: No.1~No.4 single clone of PM(7)-*lacc*-P<sub>AOX</sub>-*lacc*-pPIC9K-*P. pastoris* GS115 (Target fragment length is 1038bp); M: Takara DL5K

**Figure S5.** FPKM value for *lacc6* in PM(4)-P<sub>AOX</sub>-2*lacc*-GS115-1 and P<sub>AOX</sub>-*lacc*-GS115 PM4\_Van: PM(4)-P<sub>AOX</sub>-2*lacc*-GS115-1 cultured with vanillin, PM4: PM(4)-P<sub>AOX</sub>-2*lacc*-GS115-1 cultured without vanillin, PAOX\_Van: P<sub>AOX</sub>-*lacc*-GS115 cultured with vanillin, PAOX: P<sub>AOX</sub>-*lacc*-GS115 cultured without vanillin

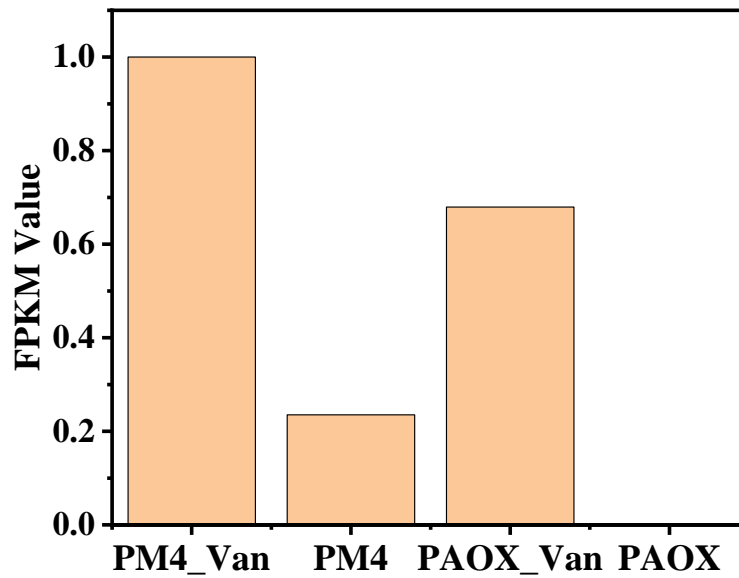

**Figure S6.** Change of vanillin concentration before and after fermentation by PM(4)-P<sub>AOX</sub>-2*lacc*-GS115-1. (A) Comparison on the UV spectra of vanillin and fermentation broth (without vanillin); (B) Change of vanillin concentration in fermentation broth with time for experimental group (addition of vanillin and methanol to induce laccase expression) and control group (without methanol); (C) UV-spectrum of fermentation broth supernatant at 0 h and 48 h for experimental group; and (D) UV-spectrum of fermentation broth supernatant at 0 h and 48 h for control group.

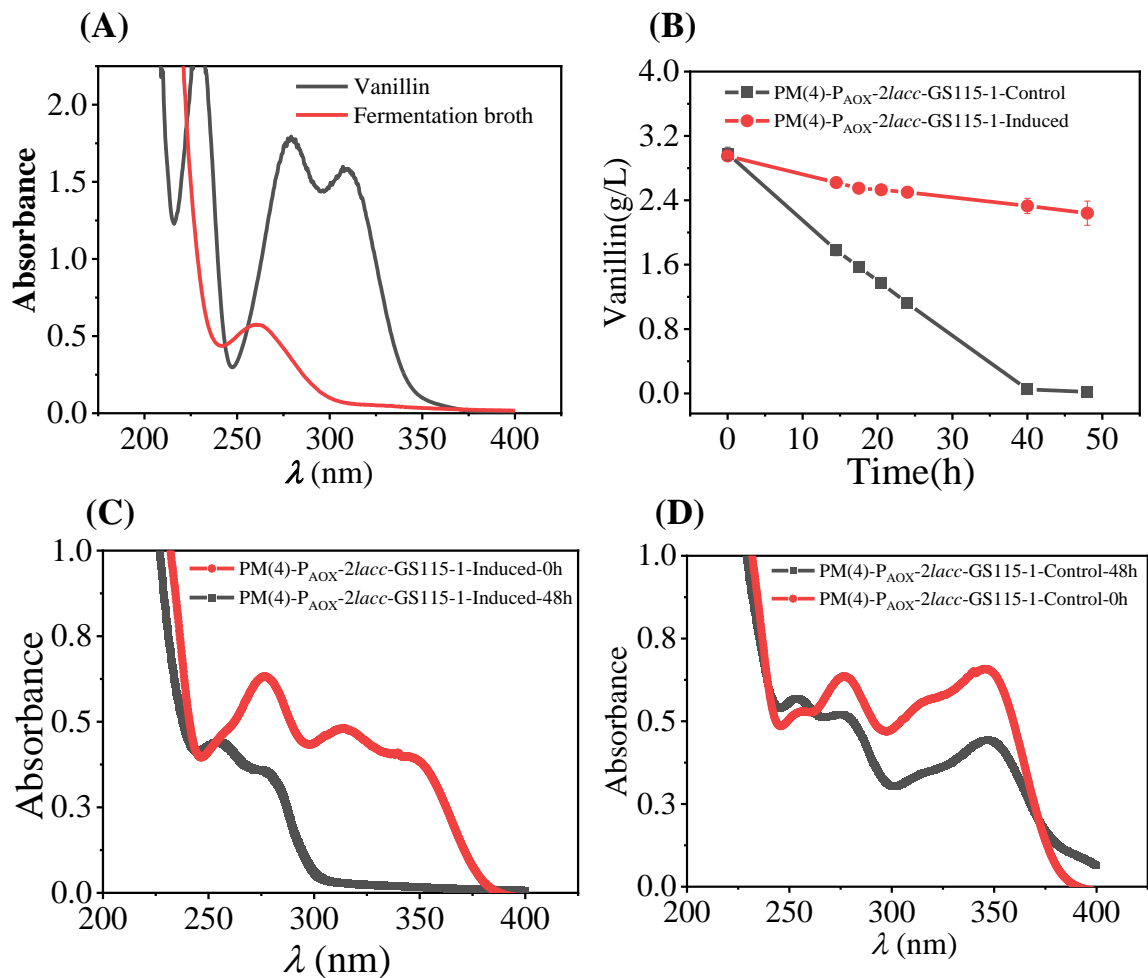



**Figure S7.** Addition of laccase in enzymatic hydrolysis of microcrystal cellulose (Avicel) with and without presence of lignin or lignin model compounds. (A) Klason lignin; (B) Tannic acid as a lignin model compound.

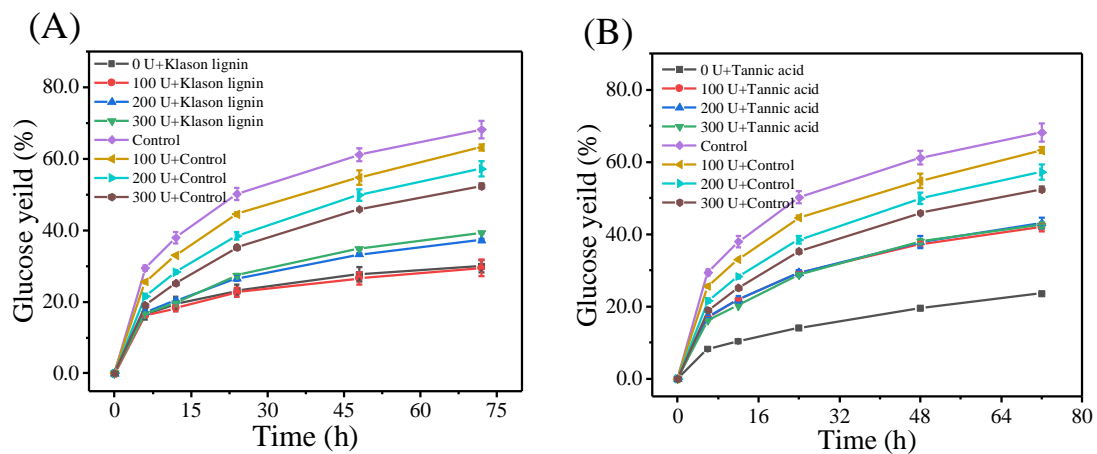

**Figure S8.** Change of phenolic and furan aldehyde stress factors under non-discharging conditions in 1.5 M KOH. (A) Vanillin; (B) Syringaldehyde; (C) *p*-hydroxy benzaldehyde; (D) Furfural; (E) 5-hydroxymethylfurfural

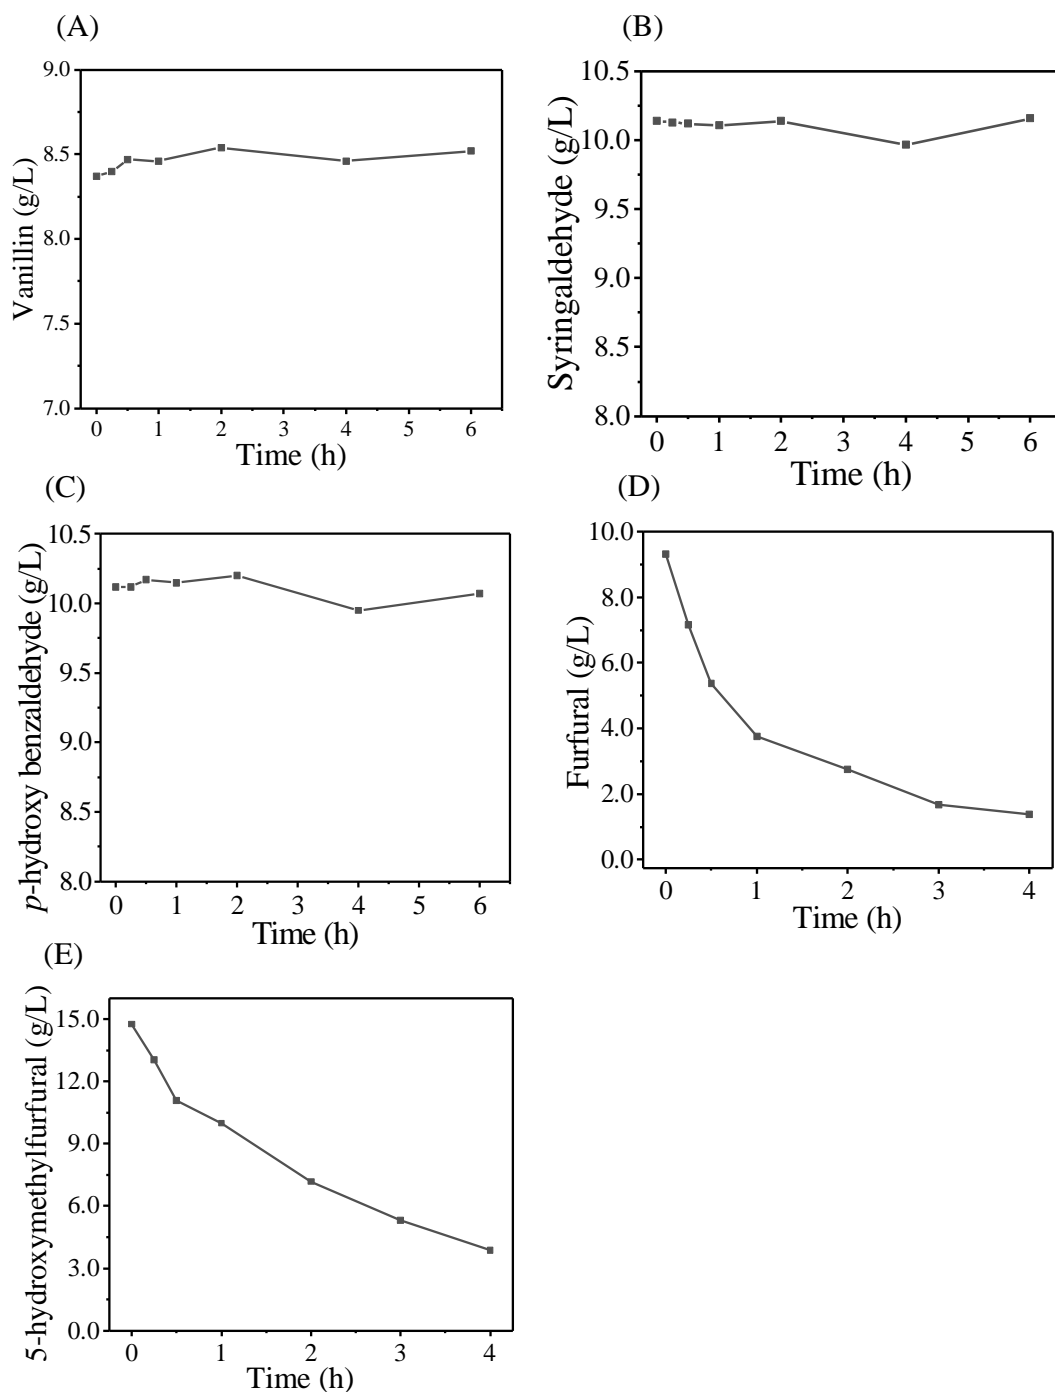

**Table S1** Primers of PM(n)-2*gfp*-pPIC9K construction

| Plasmid                      | Primer | Sequence                                            |
|------------------------------|--------|-----------------------------------------------------|
| PM1-2 <i>gfp</i> -pPIC9<br>K | PM1-F  | ACAGTTATTATTCGACGATGACCACCTTGGTAGAGGA               |
|                              | PM1-R  | TCATCGTTTGGATCCCTACCAGGGCTTTTCTTAACTTATATATCCTGG    |
|                              | PM1V-F | GAAAAGCCCTGGTAGGGATCCAAACGATGAGATTCCTTCAATT         |
|                              | PM1V-R | CCAAGGTGGTCATCGTCGAATAATAACTGTTATTTTCAGTGTCCCGATCTG |
| PM2-2 <i>gfp</i> -pPIC9<br>K | PM2-F  | ACAGTTATTATTCGACCCTCATATACATAAATAGATAGCACCACGAT     |
|                              | PM2-R  | TCATCGTTTGGATCCTGGGTTGATCCTACGGAAAACGTC             |
|                              | PM2V-F | CGTAGGATCAACCCAGGATCCAAACGATGAGATTCCTTCA            |
|                              | PM2V-R | TTATGTATATGAGGGTCGAATAATAACTGTTATTTTCAGTGTCCCGATCTG |
| PM3-2 <i>gfp</i> -pPIC9<br>K | PM3-F  | TCATCGTTTGGATCCTTCAAGTCAACTTTTCAAGTGATCCAACTGT      |
|                              | PM3-R  | ACAGTTATTATTCGAAATTGGTTTGCCTGTTGTTTCAAATTGT         |
|                              | PM3V-F | AAAAGTTGACTTGAAGGATCCAAACGATGAGATTCCTTCAA           |
|                              | PM3V-R | ACAGGCAAACCAATTTTGAATAATAACTGTTATTTTCAGTGTCCCGAT    |
| PM4-2 <i>gfp</i> -pPIC9<br>K | PM4-F  | TCATCGTTTGGATCCGATGAGTTACAGAGAGTACGAAAAAGAAGAGAGAG  |
|                              | PM4-R  | ACAGTTATTATTCGACCAAACCTTATGGAAGAACTTGGATACAGC       |
|                              | PM4V-F | TCTCTGTAACCTCATCGGATCCAAACGATGAGATTCCTTCAATTTT      |
|                              | PM4V-R | CTTCATAAGTTTGGTCGAATAATAACTGTTATTTTCAGTGTCCCGATCTG  |
| PM5-2 <i>gfp</i> -pPIC9<br>K | PM5-F  | TCATCGTTTGGATCCTTCAAAGTGTTTATGATTGAGGTTCAAGACAG     |
|                              | PM5-R  | ACAGTTATTATTCGAACATATGATTGGTGCCTACGTTTTGC           |
|                              | PMV5-F | CATAAACACTTTGAAGGATCCAAACGATGAGATTCCTTCAA           |
|                              | PMV5-R | GCACCAATCATATGTTTGAATAATAACTGTTATTTTCAGTGTCCCGAT    |
| PM6-2 <i>gfp</i> -pPIC9<br>K | PM6-F  | ACAGTTATTATTCGATTGTACAAAGATTGGGCGTCCAAG             |
|                              | PM6-R  | CTCATCGTTTGGATCCGTTGCTGTTGGAGGTAAAAACTTTAGAGAATATG  |
|                              | PM6V-R | CCAATCTTTGTACAATCGAATAATAACTGTTATTTTCAGTGTCCCGAT    |
|                              | PMV6-F | TACCTCCAACAGCAACGGATCCAAACGATGAGATTCCTTCAATTTT      |
| PM7-2 <i>gfp</i> -pPIC9<br>K | PM7-F  | ACAGTTATTATTCGATTGCAGGCAAATAAGTCAACCACG             |
|                              | PM7-R  | TCATCGTTTGGATCCACCTAAGTCATATAGGTGGTGTCTCTCG         |
|                              | PM7V-F | CTATATGACTTAGGTGGATCCAAACGATGAGATTCCTTCAATT         |

|                                   |         |                                                       |
|-----------------------------------|---------|-------------------------------------------------------|
|                                   | PM7V-R  | TTATTTTGCCTGCAATCGAATAATAACTGTTATTTTTCAGTGTTCCCGAT    |
| PM8-2 <i>gfp</i> -pPIC9<br><br>K  | PM8-F   | AAATCTCATCGTTTGGATCCGGGGAAACCTCCACTATTTATATACATGTCC   |
|                                   | PM8-R   | ACAGTTATTATTTCGAATGATACCACAAAGATGAAAGTTTATGCCAAAC     |
|                                   | PM8V-F  | TAAATAGTGGAGGTTTCCCCGGATCCAAACGATGAGATTTCTTCAATTTT    |
|                                   | PM8V-R  | TCTTTGTGGTATCATTTCGAATAATAACTGTTATTTTTCAGTGTTCCCGAT   |
| PM9-2 <i>gfp</i> -pPIC9<br><br>K  | PM9-F   | ACAGTTATTATTTCGACTAAAAAAGTTTGAAATGCTGAAGCGGAAA        |
|                                   | PM9-R   | TCATCGTTTGGATCCATTATGATTTGTGAGGTGAAAGTGAATGTTTCTATTT  |
|                                   | PM9V-F  | CTCACAAATCATAATGGATCCAAACGATGAGATTTCTTCAATT           |
|                                   | PM9V-R  | TCAAACTTTTTTTAGTCGAATAATAACTGTTATTTTTCAGTGTTCCCGATCTG |
| PM10-2 <i>gfp</i> -pPIC9<br><br>K | PM10-F  | TCATCGTTTGGATCCTAAGAGTTAATTCGATAGTAAGAGGGATCAGCAAG    |
|                                   | PM10-R  | ACAGTTATTATTTCGACACGCCTAAGCTGAAGCTTCC                 |
|                                   | PM10V-F | TCAATTAACCTTAGGATCCAAACGATGAGATTTCTTCA                |
|                                   | PM10V-R | TTCAGCTTAGGCGTGTGCAATAATAACTGTTATTTTTCAGTGTTCCCGATCTG |
| PM11-2 <i>gfp</i> -pPIC9<br><br>K | PM11-F  | TCATCGTTTGGATCCTCAGGTGGATCAAGTCTATCAGTTGAAATTCT       |
|                                   | PM11-R  | ACAGTTATTATTTCGATACTGTTTGAACGTAACGAGCTTGG             |
|                                   | PM11V-F | ACTTGATCCACCTGAGGATCCAAACGATGAGATTTCTTCA              |
|                                   | PM11V-R | TACGTTCAAACAGTATCGAATAATAACTGTTATTTTTCAGTGTTCCCGAT    |

**Table S2** Primers of PM(n)-*lacc*-pPIC9K construction

| Plasmid                                           | Primer    | Sequence                                                 |
|---------------------------------------------------|-----------|----------------------------------------------------------|
| P <sub>AOX</sub> - <i>lacc</i> -pPIC9K            | nPloc-V-R | CCGCCTCCTCCGTGGTGGTGGTGGTGGTGCATCTACGTAAGCTTCAGCC<br>TCT |
|                                                   | nPloc-V-F | CATCAAAGCTGCTTATGGGCTAGGCGAATTAATTCGCCTTAGACAT           |
|                                                   | nPloc-F   | ACCACCACCACCACGGAGGAGGCGGTAGCGCTATCGGTCCAGTCGGAA         |
|                                                   | nPloc-R   | GTCTAAGGCGAATTAATTCGCCTAGCCCATAAAGCAGCTTTGATGGGT         |
| PM(4)-P <sub>AOX</sub> -2 <i>lacc</i> -<br>pPIC9K | 4-2A-F    | GTA ACTCATCGGATCCAAACGATGAGATTTCTTCAATTT                 |
|                                                   | 4-2A-R    | ATGAGTAAACTTGGTCTGACAGTCTCACTTAATCTTCTGTACTC             |
|                                                   | 4-2F      | CAC TTTTCGGGGAAATGTGCCAAACTTATGGAAGAACTTGGA              |
|                                                   | 4-2R      | AATCTCATCGTTTGGATCCGATGAGTTACAGAGAGTACGA                 |
|                                                   | 4-2V-F    | AAGTTCCTCCATAAGTTTGGCACATTTCCCCGAAAAGTGCCA               |
|                                                   | 4-2V-R    | AGAGTACAGAAGATTAAGTGAGACTGTCAGACCAAGTTTACTCAT            |
| PM(4)-P <sub>AOX</sub> - <i>lacc</i> -p<br>PIC9K  | 4-F       | AAAATAACAGTTATTATTCGACCAAACCTTATGGAAGAACTTGGA            |
|                                                   | 4-R       | TCGTCTTTGGATGTTAGATCGATGAGTTACAGAGAGTACG                 |
|                                                   | 4-V-F     | TCGTACTCTCTGTA ACTCATCGATCTAACATCCAAAGACGAAAG            |
|                                                   | 4-V-R     | TCCAAGTTCTTCCATAAGTTTGGTTCGAATAATAACTGTTATTTT            |
| PM(4)- <i>lacc</i> -pPIC9<br>K                    | 4P-V-F    | TCAAAGCTGCTTATGGGCTAGGAATTAATTCGCCTTAGACATGAC            |
|                                                   | 4P-V-R    | GGAAATCTCATCGTTTGGATCCGATGAGTTACAGAGAGTACGAA             |
|                                                   | 4Ploc-F   | TGTA ACTCATCGGATCCAAACGATGAGATTTCTTCAATTTTFTA            |
|                                                   | 4Ploc-R   | TCTAAGGCGAATTAATTCCTAGCCCATAAAGCAGCTTTGAT                |
| PM(7)-P <sub>AOX</sub> -2 <i>lacc</i> -<br>pPIC9K | 7-2A-F    | CACCACCTATATGACTTAGGTGGATCCAAACGATGAGATTTCC              |
|                                                   | 7-2A-R    | GAGTAAACTTGGTCTGACAGTCTCACTTAATCTTCTGTACTC               |
|                                                   | 7-2F      | ACTTTTCGGGGAAATGTGTTGCAGGCAAAATAAGTCAACC                 |
|                                                   | 7-2R      | AAATCTCATCGTTTGGATCCACCTAAGTCATATAGGTGGTGTT              |
|                                                   | 7-2V-F    | TTGACTTATTTTGCCTGCAACACATTTCCCCGAAAAGTGCCA               |
|                                                   | 7-2V-R    | GTACAGAAGATTAAGTGAGACTGTCAGACCAAGTTTACTCAT               |
| PM(7)-P <sub>AOX</sub> - <i>lacc</i> -p<br>PIC9K  | 7-F       | AAAATAACAGTTATTATTCGATTGCAGGCAAAATAAGTCAACC              |
|                                                   | 7-R       | TTCGTCCTTTGGATGTTAGATCACCTAAGTCATATAGGTGGTGTT            |
|                                                   | 7-V-F     | CACCACCTATATGACTTAGGTGATCTAACATCCAAAGACGAAA              |
|                                                   | 7-V-R     | TTGACTTATTTTGCCTGCAATCGAATAATAACTGTTATTTTTCAG            |
| PM(7)- <i>lacc</i> -pPIC9<br>K                    | 7P-V-F    | AAGCTGCTTATGGGCTAGGAATTAATTCGCCTTAGACATGAC               |
|                                                   | 7P-V-R    | AATCTCATCGTTTGGATCCACCTAAGTCATATAGGTGGTGTTTC             |
|                                                   | 7Ploc-F   | ACACCACCTATATGACTTAGGTGGATCCAAACGATGAGATTTCTT            |
|                                                   | 7Ploc-R   | ATGTCTAAGGCGAATTAATTCCTAGCCCATAAAGCAGCTTTGA              |

**Table S3** Screened candidate promoters

| Promoter | Promoter source<br>gene ID | Promoter source<br>gene symbol | Encoded protein                                                                              |
|----------|----------------------------|--------------------------------|----------------------------------------------------------------------------------------------|
| PM1      | 8197957                    | PAS_chr1-3_0024                | Succinate semialdehyde dehydrogenase<br>Deoxyhypusine hydroxylase, a HEAT-repeat             |
| PM2      | 8197992                    | PAS_chr2-1_0553                | containing metalloenzyme that catalyses<br>hypusine formation                                |
| PM3      | 8198120                    | PAS_chr2-1_0517                | Nuclear protein that contains a SET-domain                                                   |
| PM4      | 8198188                    | PAS_chr2-2_0288                | Arginase, responsible for arginine degradation                                               |
| PM5      | 8198636                    | PAS_chr2-2_0476                | hypothetical protein                                                                         |
| PM6      | 8198683                    | PAS_chr2-2_0279                | Hypothetical protein                                                                         |
| PM7      | 8198872                    | PAS_chr2-1_0404                | Transcriptional repressor and activator                                                      |
| PM8      | 8198933                    | PAS_chr2-1_0580                | Cytosolic NADP-specific isocitrate<br>dehydrogenase                                          |
| PM9      | 8199862                    | PAS_chr3_0493                  | Hypothetical protein                                                                         |
| PM10     | 8201384                    | PAS_chr4_0677                  | Gamma-aminobutyrate (GABA) transaminase<br>(4-aminobutyrate aminotransferase)                |
| PM11     | 8201408                    | PAS_chr4_0460                  | Nonessential protein that binds actin filaments<br>and localizes to actin patches and cables |
